# Supplementary material for: Inhibiting TLR4 signaling by linarin for preventing inflammatory response in osteoarthritis
Source: publisher site journal article supplement (doi:10.18632/aging.202469), 2021-02-01
Supplement: Supplementary file [file aging-v13i4-202469-supplementary-material-SD1.pdf]

SUPPLEMENTARY FIGURE

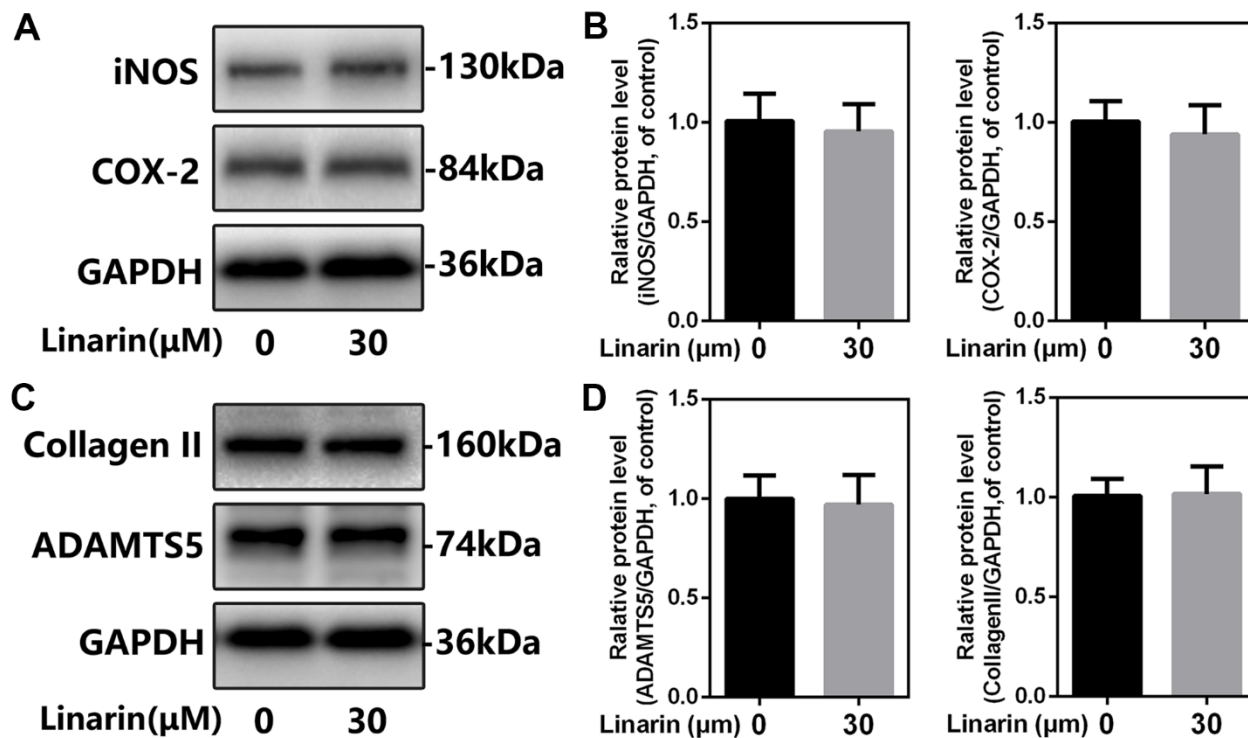

**Supplementary Figure 1. Effect of Linarin alone treatment on chondrocyte inflammation and ECM protein.** (A, B) iNOS and COX-2 protein level in chondrocytes measured by western blot. (C, D) Collagen II and ADAMTS5 protein level in chondrocytes measured by western blot.
